# Supplementary material
Source: Springer Nature journal article supplement (https://www.springermedizin.de/resource/supplementary/12985_2011_2206_MOESM5_ESM.pdf/9606292)

(a)

### CXCL13 VALUE IN RESPONSE TO PEG-INTRON

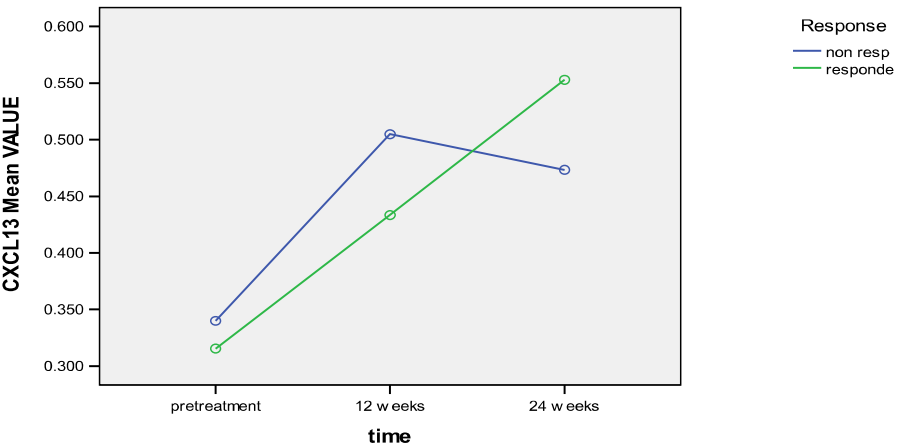

(b)

### CXCL13 VALUE IN RESPONSE TO PEGASYS

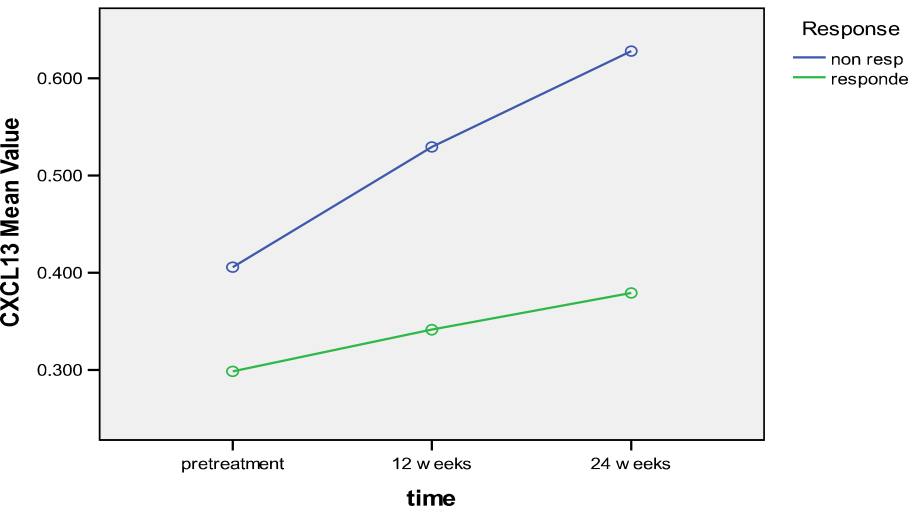

Supplement: MOESM5 [file 9606292]
